# Supplementary material
Source: PubMed Central journal article supplement (PMC2998105)

## Supplementary Figures

**Fig. 1 SK1a and SK1b expression in LNCaP and LNCaP-AI cells.** (a) RT-PCR with gene specific primers comparing the mRNA expression of SK1 in LNCaP and LNCaP-AI cells. GAPDH expression was analysed using specific primers to ensure equal RNA sampling; (b) western blots comparing SK1a, SK1b and PARP protein expression in LNCaP and LNCaP-AI cells. The western blots were reprobed with anti-ERK-2 antibody to ensure comparable protein loading. Results are representative of 3 separate experiments.

**Fig. 2 Densitometric quantification of SK1b immunoreactivity.** Immunoreactivity of western blots for SK1b (total cell lysate protein equalised/sample using the BCA protein assay) was quantified by densitometry and expressed as a percentage of the control (100%). Statistical analysis was performed using unpaired t-tests. *P* values were as follows: SKi (24h) vs control, <0.001; SKi (48h) vs control, <0.001; DMS vs control, <0.001; cycloheximide vs control, NS; cycloheximide/SKi vs SKi (24h), NS; MG132 (48h) vs control, NS; MG132/SKi vs SKi (48h), <0.01; fumonisin vs control, NS; fumonisin/SKi vs SKi (24h), <0.01; CA074Me vs control, <0.05; CA074Me/SKi vs SKi (48h), NS; MG132 (24h) vs control, NS; C2 ceramide vs control, <0.001; MG132/C2 ceramide vs C2 ceramide, <0.01; siRNA SK1 vs control, NS; siRNA SK1/SKi vs scrambled siRNA/SKi, <0.05; siRNA SK1/SKi vs siRNA SK1 alone < 0.05. Values of *n* were from 3-12 experiments. NS denotes not significant.

**Fig. 3 SKi does not decrease SK1 and cyclin D1 mRNA expression.** Bar chart showing that SKi (10 $\mu$ M, 24 h) does not decrease SK1 and cyclin D1 mRNA expression in LNCaP cells as assessed using real time PCR. SKi (10 $\mu$ M, 24 h)-treatment of LNCaP cells induces degradation of SK1b (Fig. 2a) and cyclin D1 (Fig. 7d), and we show here also induces degradation of SK1a in LNCaP cells.

**Fig. 4 Lack of effect of the cathepsin B inhibitor, CA074Me on the SKi-induced degradation of SK1a and SK1b.** Western blot showing the lack of effect of CA074Me (10 $\mu$ M, 48 h) on the SKi (10 $\mu$ M, 48 h)-induced degradation of SK1a and SK1b in LNCaP cells. The western blots were reprobed with anti-actin antibody to ensure comparable protein loading. Results are representative of 3 separate experiments.

**Fig. 5 Lack of effect of dihydrosphingosine or C2-dihydroceramide on SK1a or SK1b expression.** Western blot showing the lack of effect of dihydrosphingosine (10 $\mu$ M, 24 h) or C2-dihydroceramide (50 $\mu$ M, 24 h) on SK1 expression in LNCaP cells. The western blots were reprobed with anti-ERK-2 antibody to ensure comparable protein loading. Results are representative of 3 separate experiments.

Suppl Fig. 1

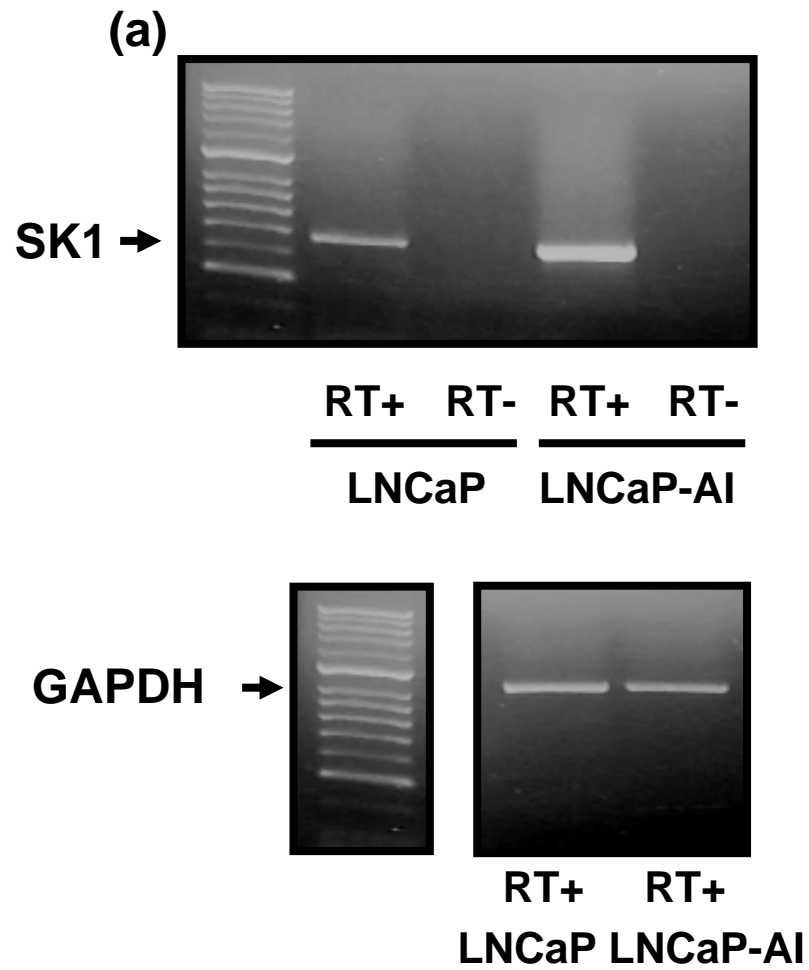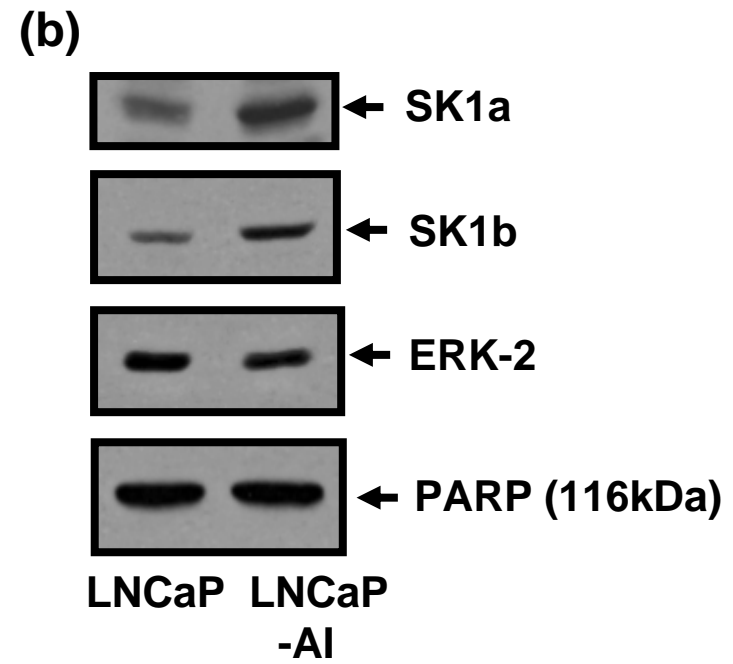

Suppl Fig. 2

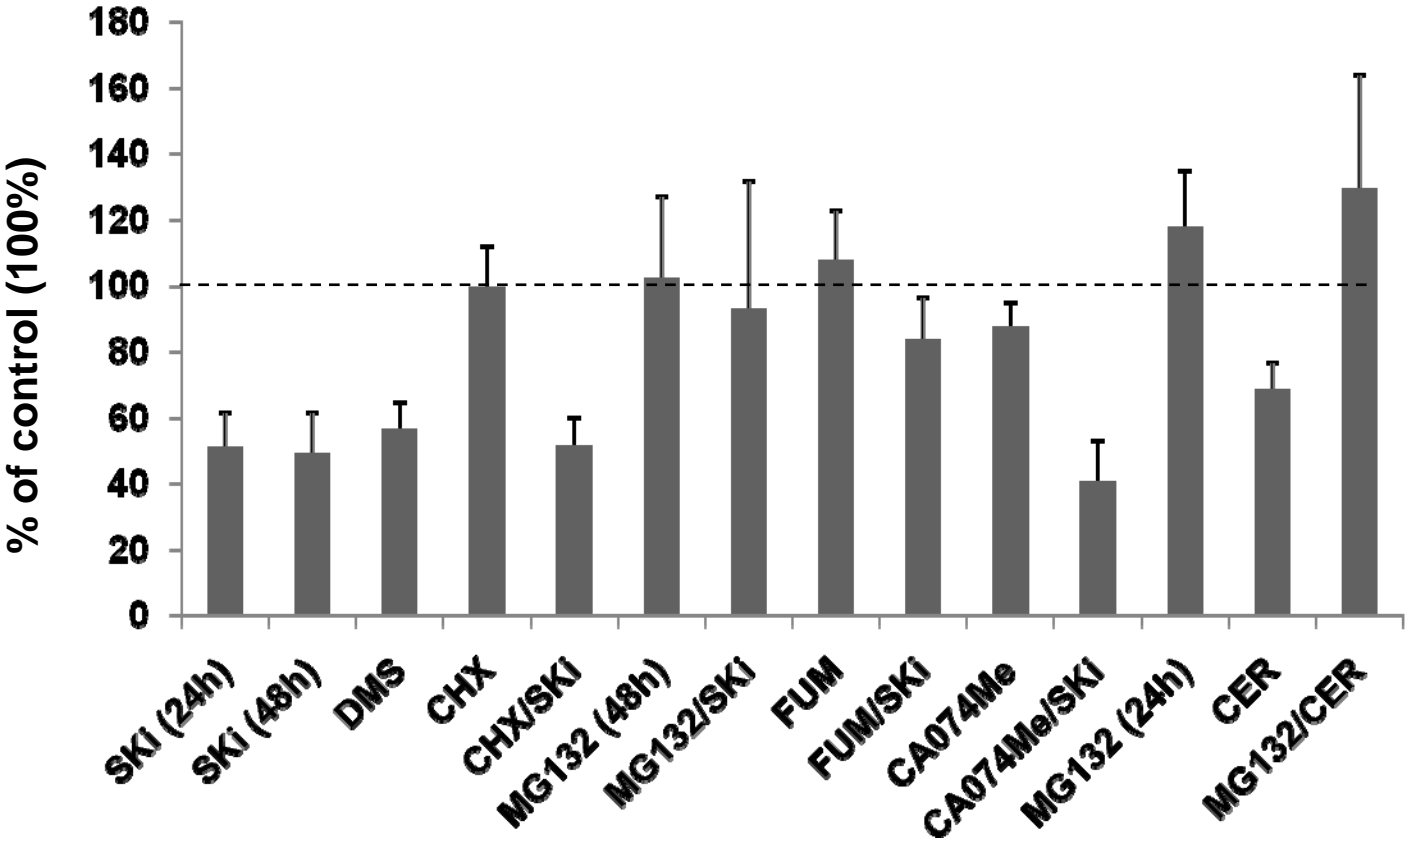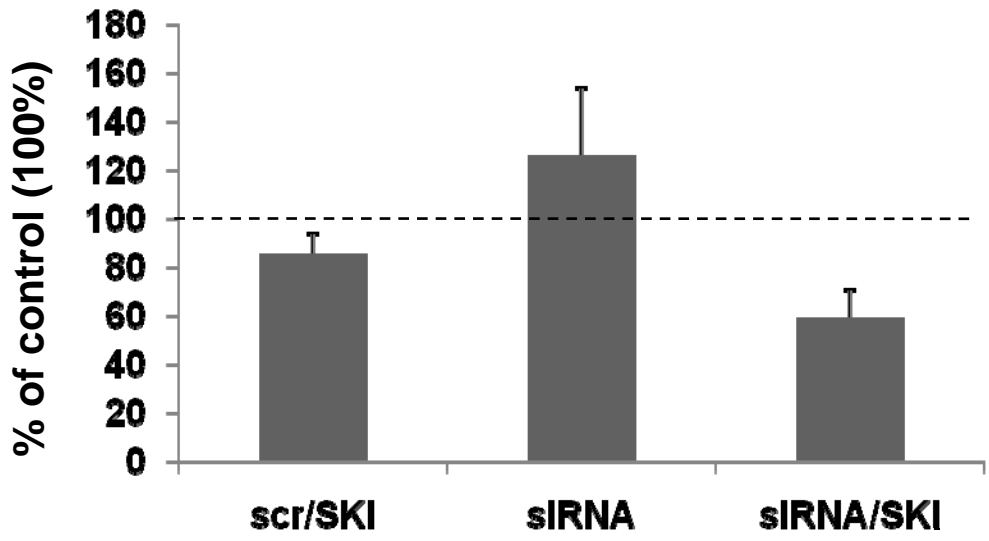

Suppl Fig. 3

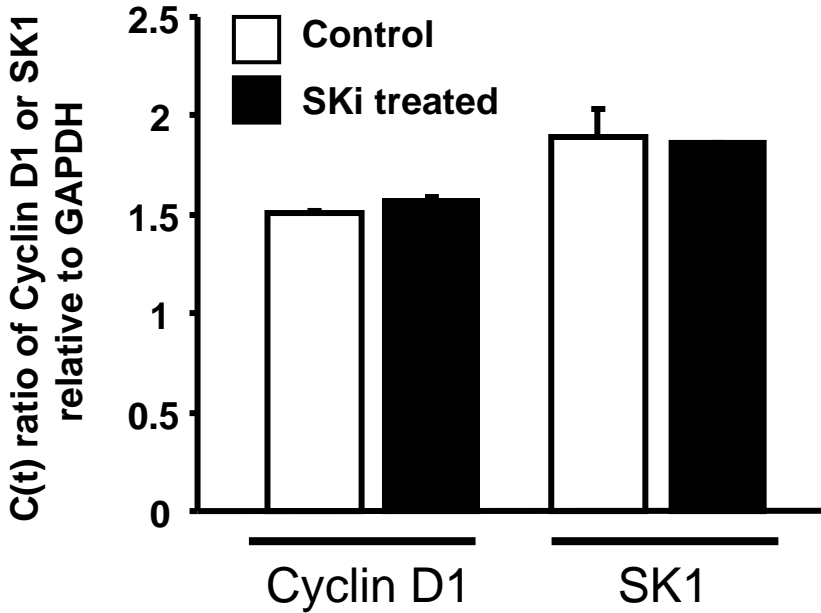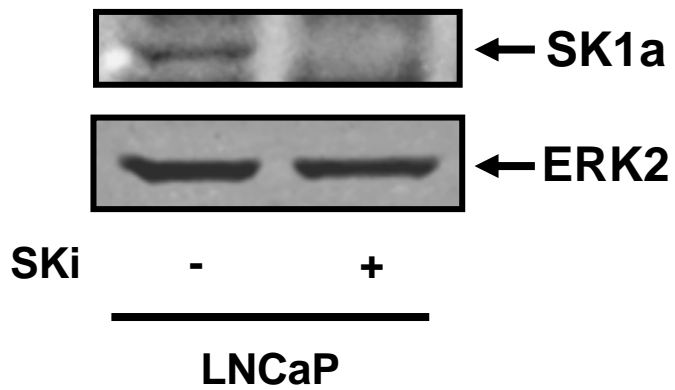

Suppl Fig. 4

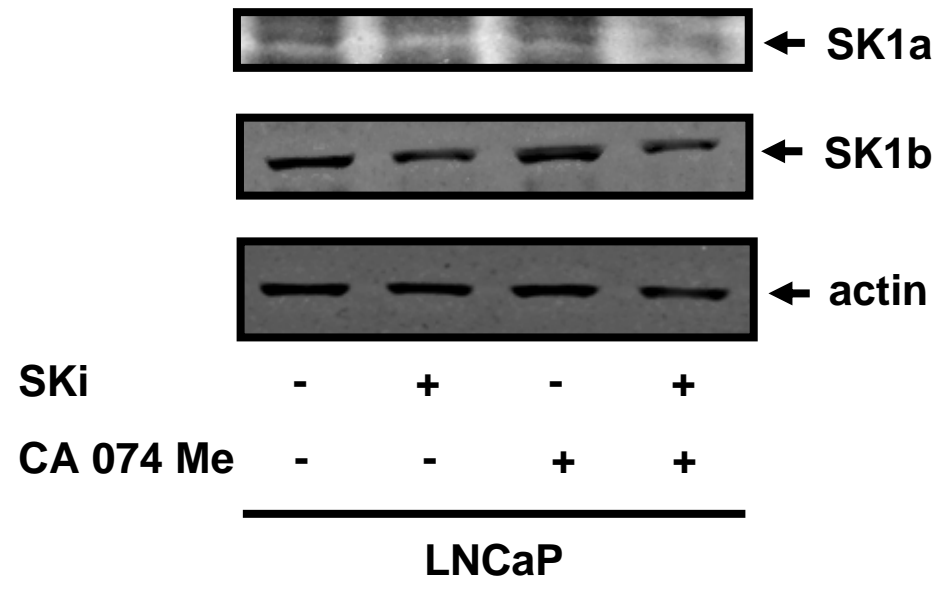

Suppl Fig.5

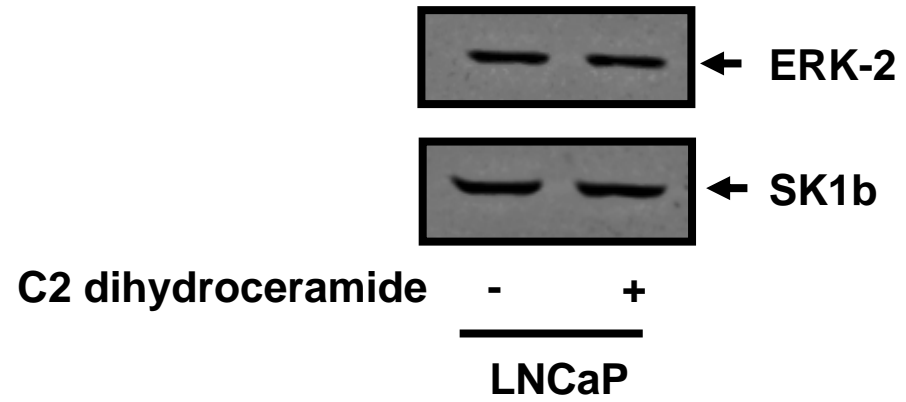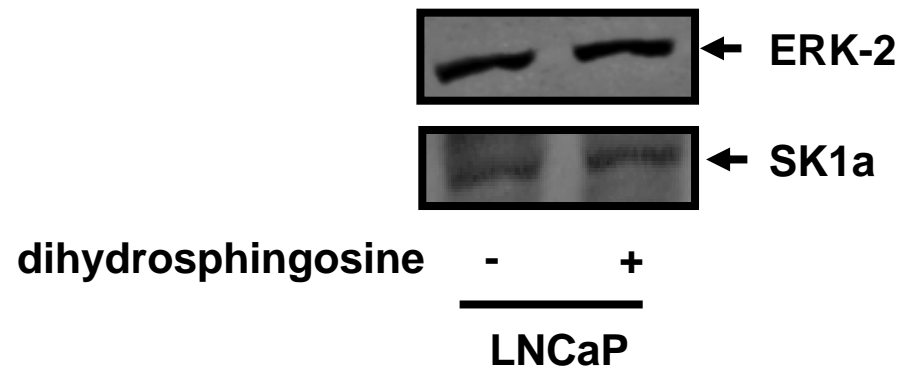

Supplement: supp_M110.127993_jbc.M110.127993-1.pdf [file supp_M110.127993_jbc.M110.127993-1.pdf]
